# Supplementary material
Source: PubMed Central journal article supplement (PMC10231148)
Supplement: aem.00361-23-s0001.pdf [file aem.00361-23-s0001.pdf]

1 **Supplementary Figures**

a. Rarefaction curve for bacteria

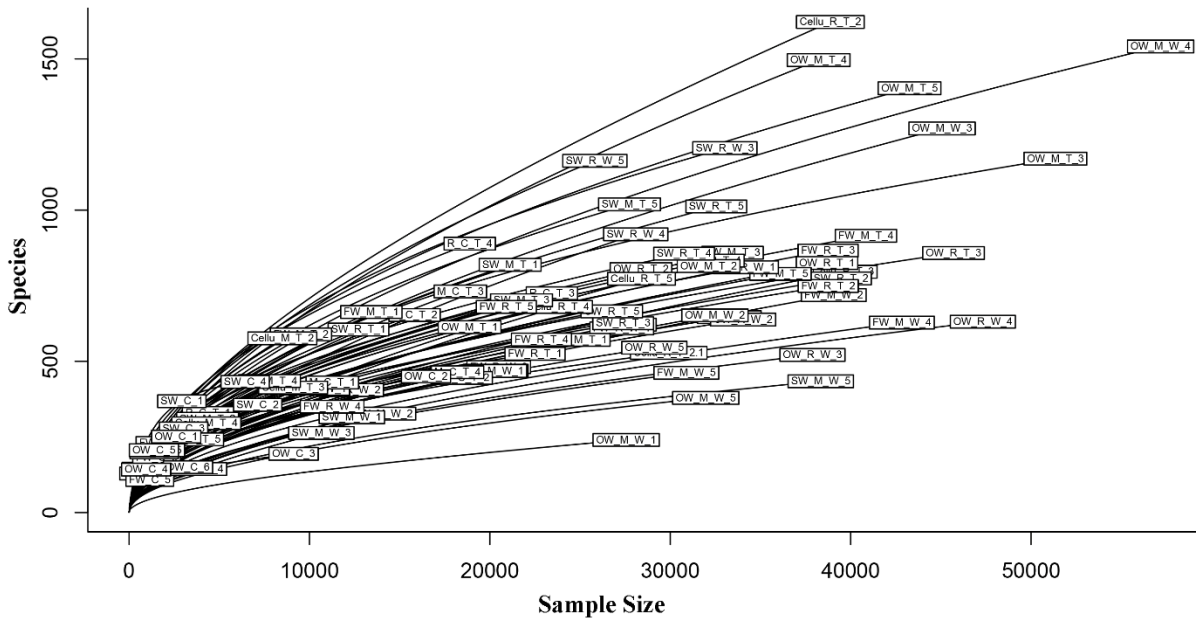

b. Rarefaction curve for fungi

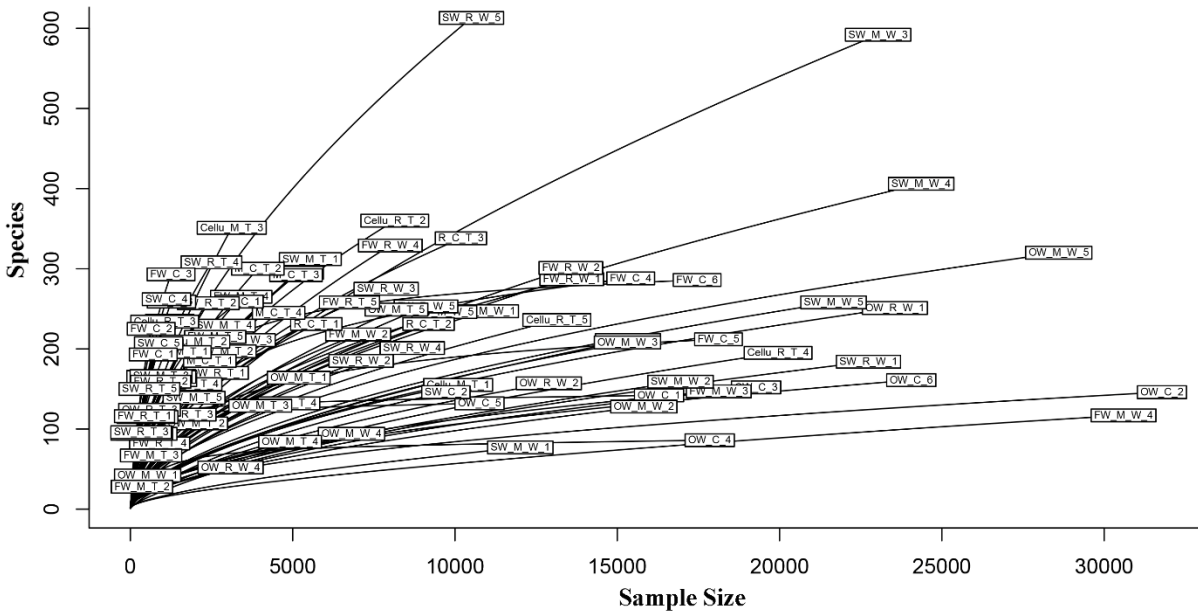

2  
3 **Supplementary Figure 1 (a)** Rarefaction curve for bacterial 16S sequences. **(b)** Rarefaction curve  
4 for fungal ITS sequences.

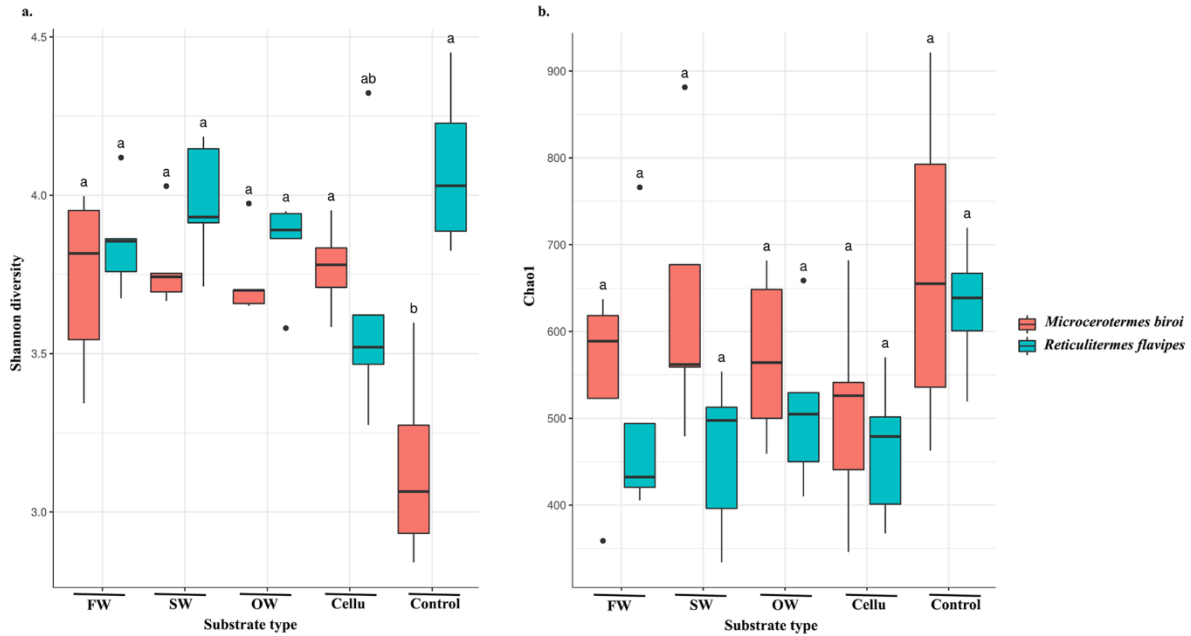

5

6 **Supplementary Figure 2. Box plot illustrating the Alpha diversity Indices in termites.**

7 **(a)** The bacterial diversity estimated by Shannon index and **(b)** the community richness determined  
 8 by Chao1 analysis within the two termite species feeding on different substrates. The different  
 9 alphabets denote significant differences estimated by Tukey HSD *post hoc* test,  $p < 0.05$ . FW- fresh  
 10 wood, SW- standard wood, OW- old wood, Cellu- Cellulose, Control- unfed termites.

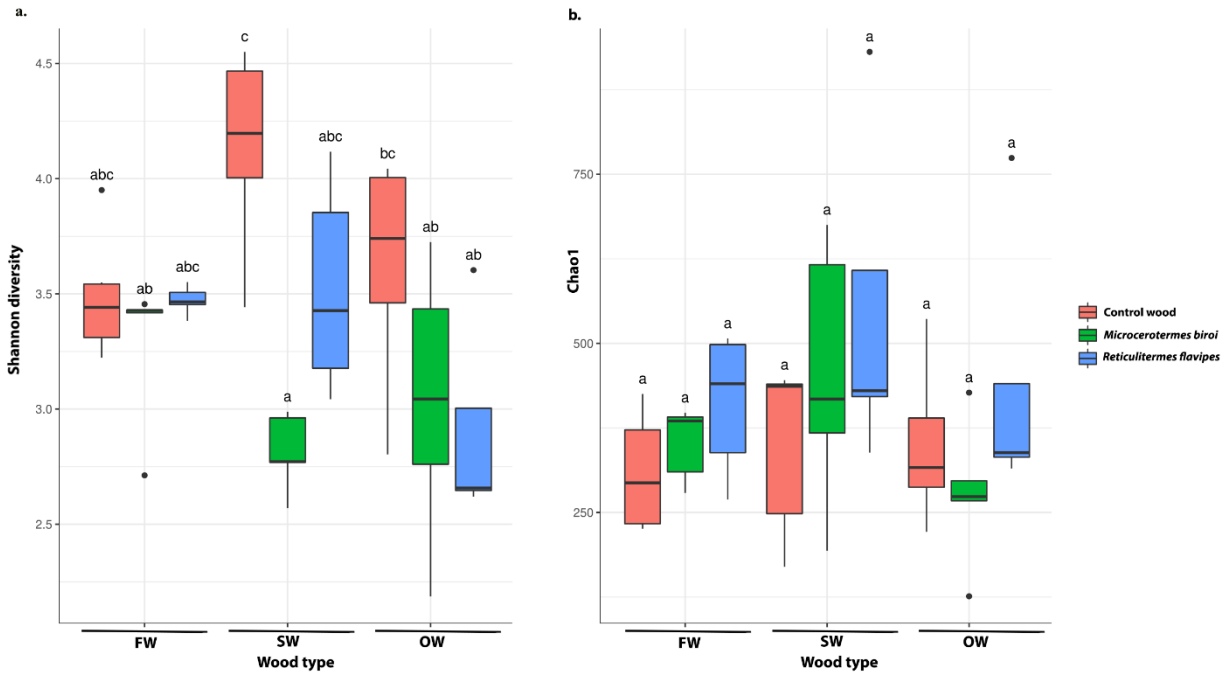

12

13 **Supplementary Figure 3. Box plot illustrating the Alpha diversity Indices in wood.**

14 (a) The bacterial diversity estimated by Shannon index and (b) the community richness determined  
 15 by Chao1 analysis within the different wood either infested by termites or uninfested control. The  
 16 different alphabets denote significant differences estimated by Tukey HSD *post hoc* test,  $p < 0.05$ .  
 17 FW- fresh wood, SW-standard wood, OW- old wood.

18

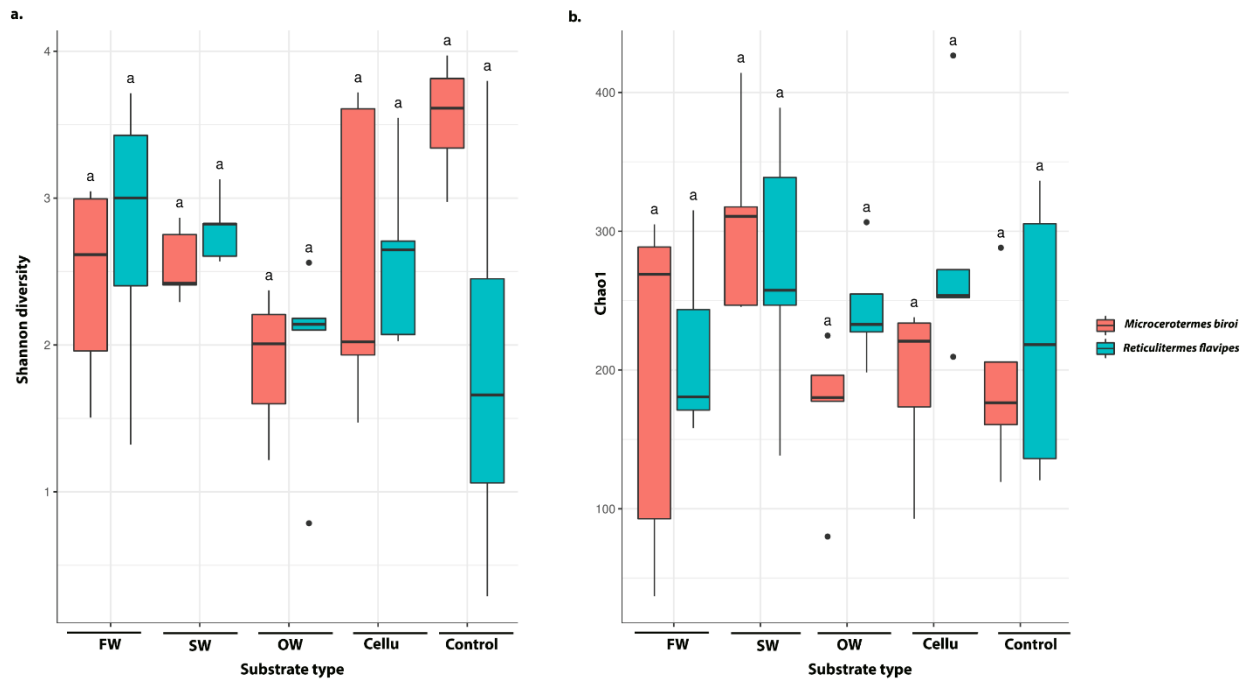

19

20 **Supplementary Figure 4. Box plot illustrating the Alpha diversity Indices in termites.**

21 (a) The fungal diversity estimated by Shannon index and (b) the community richness determined  
 22 by Chao1 analysis within the different termite species feeding on different substrates. The different  
 23 alphabets denote significant differences estimated by Tukey HSD *post hoc* test,  $p < 0.05$ . FW- fresh  
 24 wood, SW-standard wood, OW- old wood, Cellu- Cellulose, Control- unfed termites.

25

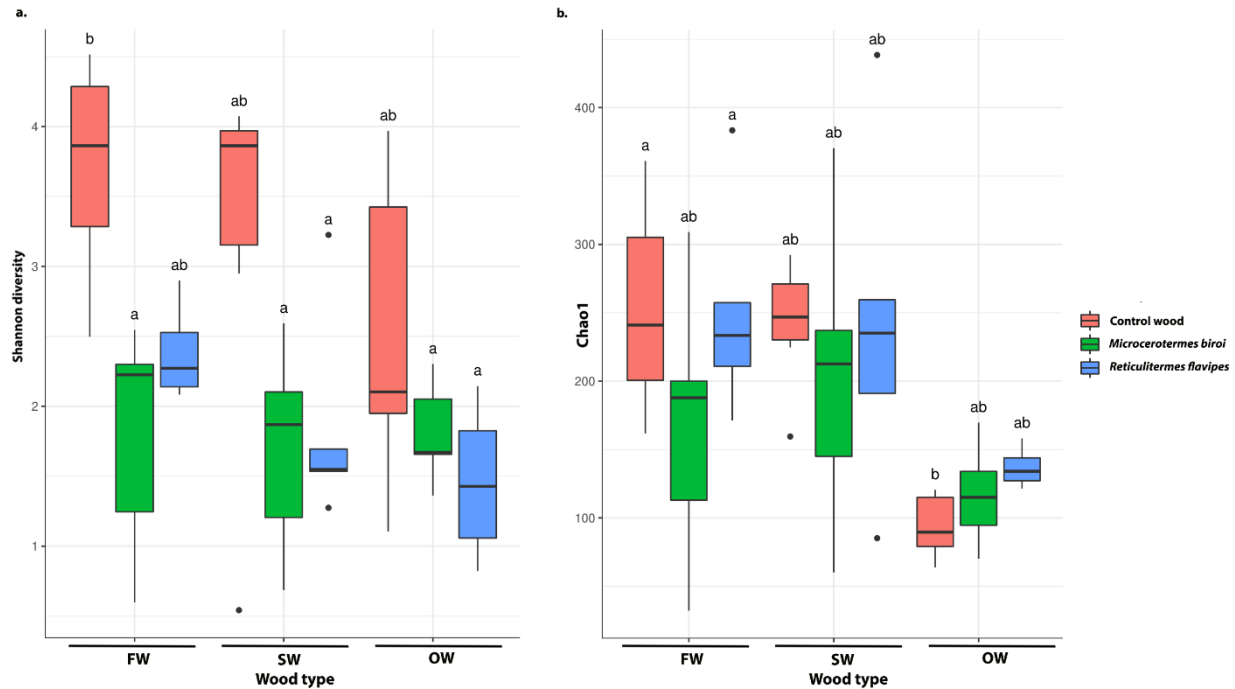

26

27 **Supplementary Figure 5. Box plot illustrating the Alpha diversity Indices in wood.**

28 **(a)** The fungal diversity estimated by Shannon index and **(b)** the community richness determined  
 29 by Chao1 analysis within the different wood either infested by termites or uninfested control. The  
 30 different alphabets denote significant differences estimated by Tukey HSD *post hoc* test,  $p < 0.05$ .  
 31 FW- fresh wood, SW-standard wood, OW- old wood.

32

33

34 **Supplementary Tables**

35 **Supplementary Table 1.** Pairwise PERMANOVA results of bacterial community composition in termite  
 36 bodies. All possible pairwise comparisons were included in the analysis but only comparisons between  
 37 substrate types within species are represented in the table. M: *Microcerotermes biroi*; R: *Reticulitermes*  
 38 *flavipes*; FW: fresh wood; SW: standard wood; OW: old wood; Cellu: Cellulose; C: Control.; T- termite

39

40

| Comparisons          | F-value | P-value | Adjusted P-value |
|----------------------|---------|---------|------------------|
| FW_M_T vs. SW_M_T    | 1.12    | 0.249   | 0.255            |
| FW_M_T vs. OW_M_T    | 1.35    | 0.14    | 0.15             |
| SW_M_T vs. OW_M_T    | 1.44    | 0.11    | 0.12             |
| FW_M_T vs. M_C_T     | 2.69    | 0.005   | 0.015            |
| FW_M_T vs. Cellu_M_T | 3.07    | 0.008   | 0.015            |
| SW_M_T vs. M_C_T     | 2.48    | 0.01    | 0.015            |
| SW_M_T vs. Cellu_M_T | 2.15    | 0.016   | 0.019            |
| OW_M_T vs. M_C_T     | 3.13    | 0.007   | 0.015            |
| OW_M_T vs. Cellu_M_T | 3.71    | 0.004   | 0.015            |
| M_C_T vs. Cellu_M_T  | 2.43    | 0.012   | 0.017            |
| FW_R_T vs. SW_R_T    | 1.09    | 0.26    | 0.26             |
| FW_R_T vs. OW_R_T    | 1.39    | 0.017   | 0.02             |
| SW_R_T vs. OW_R_T    | 1.31    | 0.066   | 0.072            |
| FW_R_T vs. R_C_T     | 3.11    | 0.007   | 0.015            |
| FW_R_T vs. Cellu_R_T | 4.55    | 0.009   | 0.015            |
| SW_R_T vs. R_C_T     | 2.77    | 0.01    | 0.015            |
| SW_R_T vs. Cellu_R_T | 4.23    | 0.007   | 0.015            |
| OW_R_T vs. R_C_T     | 3.33    | 0.007   | 0.015            |
| OW_R_T vs. Cellu_R_T | 4.69    | 0.01    | 0.015            |
| R_C_T vs. Cellu_R_T  | 4.4     | 0.008   | 0.015            |

41 **Supplementary Table 2.** Pairwise PERMANOVA results of bacterial community composition in wood  
42 pieces. All possible pairwise comparisons were included in the analysis but only comparisons between wood  
43 types within species are represented in the table. M: *Microcerotermes biroi*; R: *Reticulitermes flavipes*; FW:  
44 fresh wood; SW: standard wood; OW: old wood; C: Control; W: wood

45

46

| Comparisons       | F-value | P-value | Adjusted P-value |
|-------------------|---------|---------|------------------|
| FW_C vs. SW_C     | 3.77    | 0.003   | 0.008            |
| FW_C vs. OW_C     | 3.89    | 0.003   | 0.008            |
| SW_C vs. OW_C     | 2.05    | 0.047   | 0.047            |
| FW_M_W vs. SW_M_W | 2.61    | 0.006   | 0.009            |
| FW_M_W vs. OW_M_W | 3.8     | 0.008   | 0.01             |
| SW_M_W vs. OW_M_W | 2.72    | 0.012   | 0.014            |
| FW_R_W vs. SW_R_W | 1.76    | 0.021   | 0.023            |
| FW_R_W vs. OW_R_W | 3.09    | 0.008   | 0.01             |
| SW_R_W vs. OW_R_W | 1.7     | 0.022   | 0.023            |

47 **Supplementary Table 3.** Pairwise PERMANOVA results of fungal community composition in termite  
 48 bodies. All possible pairwise comparisons were included in the analysis but only comparisons between  
 49 substrate types within species are mentioned in the table. M: *Microcerotermes biroi*; R: *Reticulitermes*  
 50 *flavipes*; FW: fresh wood; SW: standard wood; OW: old wood; Cel: Cellulose; C: Control; T:termite

51

52

53

| Comparisons          | F-value | P-value | Adjusted P-value |
|----------------------|---------|---------|------------------|
| FW_M_T vs. SW_M_T    | 0.96    | 0.486   | 0.486            |
| FW_M_T vs. OW_M_T    | 1.35    | 0.141   | 0.167            |
| SW_M_T vs. OW_M_T    | 2.03    | 0.02    | 0.033            |
| FW_M_T vs. M_C_T     | 1.79    | 0.05    | 0.066            |
| FW_M_T vs. Cellu_M_T | 1.09    | 0.275   | 0.302            |
| SW_M_T vs. M_C_T     | 2.2     | 0.026   | 0.039            |
| SW_M_T vs. Cellu_M_T | 1.03    | 0.356   | 0.381            |
| OW_M_T vs. M_C_T     | 2.33    | 0.008   | 0.024            |
| OW_M_T vs. Cellu_M_T | 2.0     | 0.007   | 0.024            |
| M_C_T vs. Cellu_M_T  | 2.34    | 0.006   | 0.024            |
| FW_R_T vs. SW_R_T    | 1.16    | 0.215   | 0.248            |
| FW_R_T vs. OW_R_T    | 0.97    | 0.481   | 0.486            |
| SW_R_T vs. OW_R_T    | 1.06    | 0.383   | 0.4              |
| FW_R_T vs. R_C_T     | 7.99    | 0.01    | 0.024            |
| FW_R_T vs. Cellu_R_T | 2.2     | 0.022   | 0.035            |
| SW_R_T vs. R_C_T     | 7.6     | 0.011   | 0.024            |
| SW_R_T vs. Cellu_R_T | 2.27    | 0.055   | 0.069            |
| OW_R_T vs. R_C_T     | 5.48    | 0.007   | 0.024            |
| OW_R_T vs. Cellu_R_T | 1.51    | 0.115   | 0.14             |
| R_C_T vs. Cellu_R_T  | 5.31    | 0.006   | 0.024            |



54 **Supplementary Table 4.** Pairwise PERMANOVA results of fungal community composition in wood  
 55 pieces. All possible pairwise comparisons were included in the analysis but only comparisons between wood  
 56 types within species are represented in the table. M: *Microcerotermes biroi*; R: *Reticulitermes flavipes*; FW:  
 57 fresh wood; SW: standard wood; OW: old wood; C: Control; W: wood

58

59

| Comparisons       | F-value | P-value | Adjusted P-value |
|-------------------|---------|---------|------------------|
| FW_C vs. SW_C     | 4.69    | 0.016   | 0.019            |
| FW_C vs. OW_C     | 5.5     | 0.003   | 0.007            |
| SW_C vs. OW_C     | 8.41    | 0.003   | 0.007            |
| FW_M_W vs. SW_M_W | 1.13    | 0.309   | 0.309            |
| FW_M_W vs. OW_M_W | 1.28    | 0.145   | 0.155            |
| SW_M_W vs. OW_M_W | 1.31    | 0.166   | 0.171            |
| FW_R_W vs. SW_R_W | 1.42    | 0.146   | 0.155            |
| FW_R_W vs. OW_R_W | 2.79    | 0.021   | 0.024            |
| SW_R_W vs. OW_R_W | 1.57    | 0.019   | 0.022            |

68

69 **Supplementary Table 5.** The overall Bacterial beta diversity associated with termites and wood samples  
 70 based on weighted and unweighted UniFrac distances. Termite species (factor with two levels:  
 71 *Microcerotermes biroi* (M) and *Reticulitermes flavipes* (R)), wood type (factor with five levels: fresh wood,  
 72 standard wood, old wood, cellulose, and controls), and their interaction (Termite species: wood type). Df  
 73 represents degree of freedom, SumsOfSqs denotes sums of squares of deviations, MeanSqs stands for SS/Df,  
 74 F. Model represents F-test value. The R2 value illustrates the ratio of grouping variance and total variance.  
 75 Pr value determines the significant variation.

76

| <b>Bacterial communities in termite bodies (weighted UniFrac)</b>   |    |           |         |         |         |           |
|---------------------------------------------------------------------|----|-----------|---------|---------|---------|-----------|
|                                                                     | Df | SumsOfSqs | MeanSqs | F.Model | R2      | Pr(>F)    |
| Termite species                                                     | 1  | 1.91673   | 1.91673 | 413.78  | 0.85002 | 0.001 *** |
| Wood type                                                           | 4  | 0.11114   | 0.02778 | 6.00    | 0.04929 | 0.001 *** |
| Termite species: wood type                                          | 4  | 0.05102   | 0.01276 | 2.75    | 0.02263 | 0.028 *   |
| Residuals                                                           | 38 | 0.17602   | 0.00463 |         | 0.07806 |           |
| Total                                                               | 47 | 2.25491   |         |         | 1.00000 |           |
| <b>Bacterial communities in termite bodies (unweighted UniFrac)</b> |    |           |         |         |         |           |
| Termite species                                                     | 1  | 3.8909    | 3.8909  | 50.192  | 0.47729 | 0.001 *** |
| Wood type                                                           | 4  | 0.7140    | 0.1785  | 2.303   | 0.08759 | 0.017 *   |
| Termite species: wood type                                          | 4  | 0.6013    | 0.1503  | 1.939   | 0.07377 | 0.048 *   |
| Residuals                                                           | 38 | 2.9458    | 0.0775  |         | 0.36136 |           |
| Total                                                               | 47 | 8.1521    |         |         | 1.00000 |           |
| <b>Bacterial communities in wood (weighted UniFrac)</b>             |    |           |         |         |         |           |

|                                                                  | <u>Df</u> | <u>SumsOfSqs</u> | <u>MeanSqs</u> | <u>F.Model</u> | <u>R2</u>      | <u>Pr(&gt;F)</u> |
|------------------------------------------------------------------|-----------|------------------|----------------|----------------|----------------|------------------|
| <u>Termite species</u>                                           | <u>2</u>  | <u>1.5906</u>    | <u>0.79528</u> | <u>33.430</u>  | <u>0.48554</u> | <u>0.001 ***</u> |
| <u>Wood type</u>                                                 | <u>2</u>  | <u>0.2720</u>    | <u>0.13600</u> | <u>5.717</u>   | <u>0.08303</u> | <u>0.001 ***</u> |
| <u>Termite species: wood type</u>                                | <u>4</u>  | <u>0.4855</u>    | <u>0.12137</u> | <u>5.102</u>   | <u>0.14820</u> | <u>0.001 ***</u> |
| <u>Residuals</u>                                                 | <u>39</u> | <u>0.9278</u>    | <u>0.02379</u> |                | <u>0.28322</u> |                  |
| <u>Total</u>                                                     | <u>47</u> | <u>3.2758</u>    |                |                | <u>1.00000</u> |                  |
| <b><u>Bacterial communities in wood (unweighted UniFrac)</u></b> |           |                  |                |                |                |                  |
| <u>Termite species</u>                                           | <u>2</u>  | <u>3.1090</u>    | <u>1.55451</u> | <u>9.7020</u>  | <u>0.26739</u> | <u>0.001 ***</u> |
| <u>Wood type</u>                                                 | <u>2</u>  | <u>0.8743</u>    | <u>0.43713</u> | <u>2.7282</u>  | <u>0.07519</u> | <u>0.001 ***</u> |
| <u>Termite species: wood type</u>                                | <u>4</u>  | <u>1.3954</u>    | <u>0.34885</u> | <u>2.1772</u>  | <u>0.12001</u> | <u>0.001 ***</u> |
| <u>Residuals</u>                                                 | <u>39</u> | <u>6.2488</u>    | <u>0.16023</u> |                | <u>0.53742</u> |                  |
| <u>Total</u>                                                     | <u>47</u> | <u>11.6275</u>   |                |                | <u>1.00000</u> |                  |

77

78 **Supplementary Table 6: Bacterial and Fungal beta diversities associated with termites and wood samples**  
79 **based on Bray-Curtis distances using Hellinger-transformed relative abundance table. Termite species**  
80 **(factor with two levels: *Microcerotermes biroi* (M) and *Reticulitermes flavipes* (R)), wood type (factor with**  
81 **five levels: fresh wood, standard wood, old wood, cellulose, and controls), and their interaction (Termite**  
82 **species: wood type). Df represents degree of freedom, SumsOfSqs denotes sums of squares of deviations,**  
83 **MeanSqs stands for SS/Df. F. Model represents F-test value. The R2 value illustrates the ratio of grouping**  
84 **variance and total variance. Pr value determines the significant variation.**

| <b><u>Bacterial communities in termite bodies</u></b> |           |                  |                |                |                |                  |
|-------------------------------------------------------|-----------|------------------|----------------|----------------|----------------|------------------|
|                                                       | <u>Df</u> | <u>SumsOfSqs</u> | <u>MeanSqs</u> | <u>F.Model</u> | <u>R2</u>      | <u>Pr(&gt;F)</u> |
| <u>Termite species</u>                                | <u>1</u>  | <u>8.8634</u>    | <u>8.8634</u>  | <u>176.317</u> | <u>0.73644</u> | <u>0.001 ***</u> |
| <u>Wood type</u>                                      | <u>4</u>  | <u>0.6747</u>    | <u>0.1687</u>  | <u>3.355</u>   | <u>0.05606</u> | <u>0.007 **</u>  |
| <u>Termite species: wood type</u>                     | <u>4</u>  | <u>0.5871</u>    | <u>0.1468</u>  | <u>2.920</u>   | <u>0.04878</u> | <u>0.016 *</u>   |
| <u>Residuals</u>                                      | <u>38</u> | <u>1.9103</u>    | <u>0.0503</u>  |                | <u>0.15872</u> |                  |
| <u>Total</u>                                          | <u>47</u> | <u>12.0355</u>   |                |                | <u>1.00000</u> |                  |
| <b><u>Bacterial communities in wood</u></b>           |           |                  |                |                |                |                  |
| <u>Termite species</u>                                | <u>2</u>  | <u>4.9888</u>    | <u>2.49438</u> | <u>16.2029</u> | <u>0.35866</u> | <u>0.001 ***</u> |
| <u>Wood type</u>                                      | <u>2</u>  | <u>1.2801</u>    | <u>0.64005</u> | <u>4.1576</u>  | <u>0.09203</u> | <u>0.001 ***</u> |
| <u>Termite species: wood type</u>                     | <u>4</u>  | <u>1.6368</u>    | <u>0.40920</u> | <u>2.6580</u>  | <u>0.11767</u> | <u>0.001 ***</u> |
| <u>Residuals</u>                                      | <u>39</u> | <u>6.0039</u>    | <u>0.15395</u> |                | <u>0.43164</u> |                  |
| <u>Total</u>                                          | <u>47</u> | <u>13.9095</u>   |                |                | <u>1.00000</u> |                  |
| <b><u>Fungal communities in termite bodies</u></b>    |           |                  |                |                |                |                  |
| <u>Termite species</u>                                | <u>1</u>  | <u>1.3235</u>    | <u>1.32349</u> | <u>8.1006</u>  | <u>0.12201</u> | <u>0.001 ***</u> |
| <u>Wood type</u>                                      | <u>4</u>  | <u>1.7391</u>    | <u>0.43477</u> | <u>2.6611</u>  | <u>0.16033</u> | <u>0.001 ***</u> |
| <u>Termite species: wood type</u>                     | <u>4</u>  | <u>1.5761</u>    | <u>0.39403</u> | <u>2.4117</u>  | <u>0.14530</u> | <u>0.001 ***</u> |
| <u>Residuals</u>                                      | <u>38</u> | <u>6.2085</u>    | <u>0.16338</u> |                | <u>0.57236</u> |                  |
| <u>Total</u>                                          | <u>47</u> | <u>10.8472</u>   |                |                | <u>1.00000</u> |                  |
| <b><u>Fungal communities in wood</u></b>              |           |                  |                |                |                |                  |
| <u>Termite species</u>                                | <u>2</u>  | <u>5.4221</u>    | <u>2.71103</u> | <u>13.0706</u> | <u>0.32005</u> | <u>0.001 ***</u> |
| <u>Wood type</u>                                      | <u>2</u>  | <u>1.4944</u>    | <u>0.74718</u> | <u>3.6023</u>  | <u>0.08821</u> | <u>0.001 ***</u> |
| <u>Termite species: wood type</u>                     | <u>4</u>  | <u>2.1434</u>    | <u>0.53584</u> | <u>2.5834</u>  | <u>0.12652</u> | <u>0.001 ***</u> |

|                  |           |                |                |  |                |  |
|------------------|-----------|----------------|----------------|--|----------------|--|
| <u>Residuals</u> | <u>38</u> | <u>7.8818</u>  | <u>0.20741</u> |  | <u>0.46523</u> |  |
| <u>Total</u>     | <u>46</u> | <u>16.9415</u> |                |  | <u>1.00000</u> |  |

85

86

87 **Supplementary Excel files**

88 Supplementary Excel 1 – Table S1. Normalized bacterial OTU table.

89 Supplementary Excel 2 – Table S2. Differential abundant bacterial communities in wood.

90 Supplementary Excel 3 – Table S3. Differential abundant bacterial communities in termites.

91 Supplementary Excel 4 – Table S4. Normalized fungal OTU table.

92 Supplementary Excel 5 – Table S5. Differential abundant fungal communities in wood.

93 Supplementary Excel 6 – Table S6. Differential abundant fungal communities in termites.

94 Supplementary Excel 7 – Table S7. Common and unique bacterial communities associated with  
95 *Reticulitermes flavipes* upon feeding on different substrates.

96 Supplementary Excel 8 – Table S8. Core and unique fungal communities associated with  
97 *Reticulitermes flavipes* upon feeding on different substrates.

98 Supplementary Excel 9 – Table S9. Common and unique bacterial communities associated with  
99 *Microcerotermes biroi* upon feeding on different substrates.

100 Supplementary Excel 10 – Table S10. Core and unique fungal communities associated with  
101 *Microcerotermes biroi* upon feeding on different substrates.
